# Supplementary material for: In vivo Protein Interference: Oral Administration of Recombinant Yeast-Mediated Partial Leptin Reduction for Obesity Control
Source: Frontiers journal article supplement (doi:10.3389/fmicb.2022.923656), 2022-06-14

## WB original images of the NC group

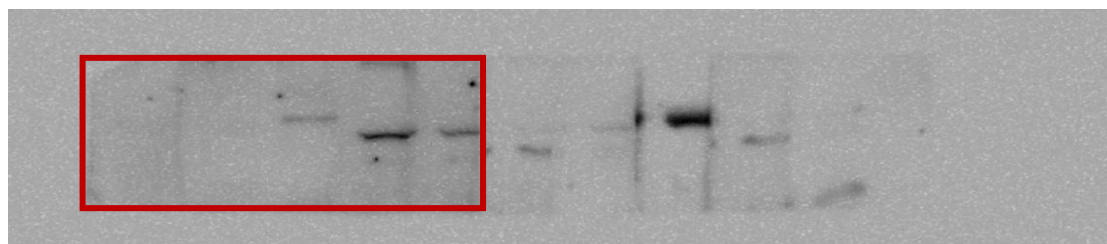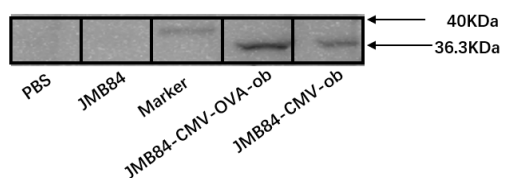

## WB original images of the DIOing group

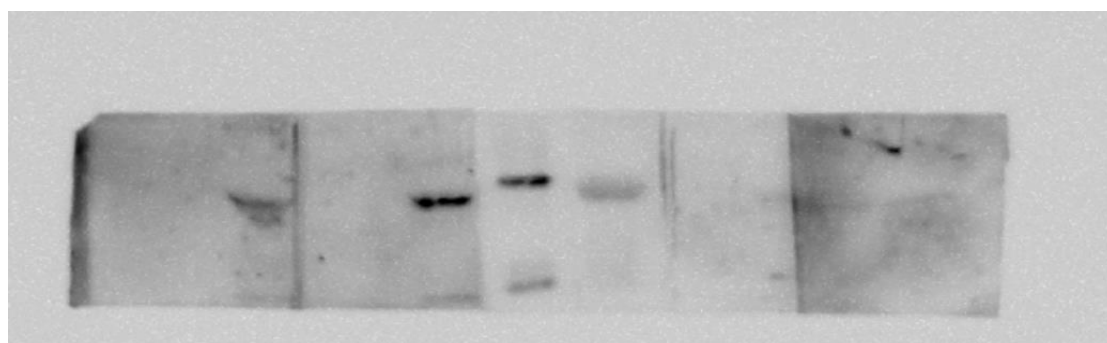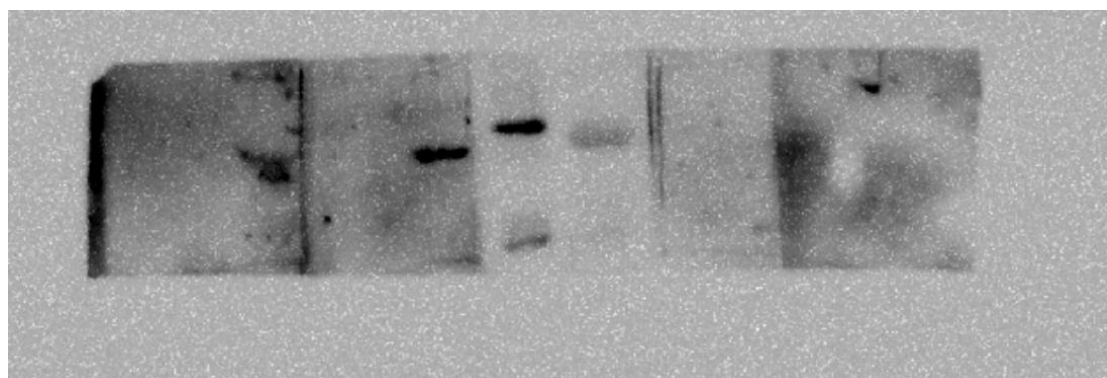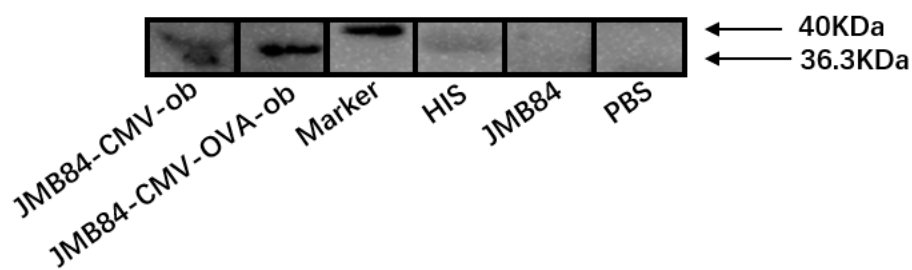

## WB original images of the DIOed group

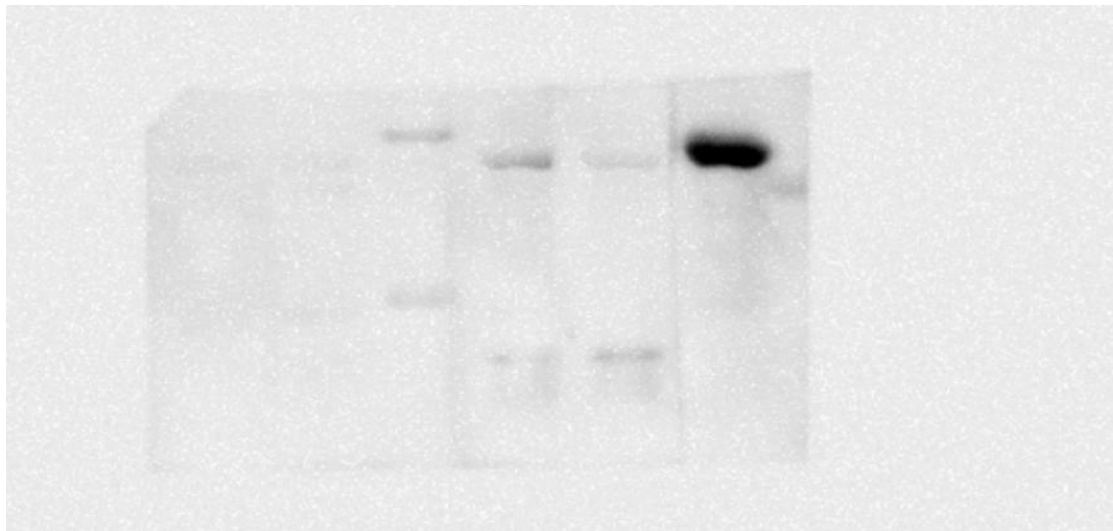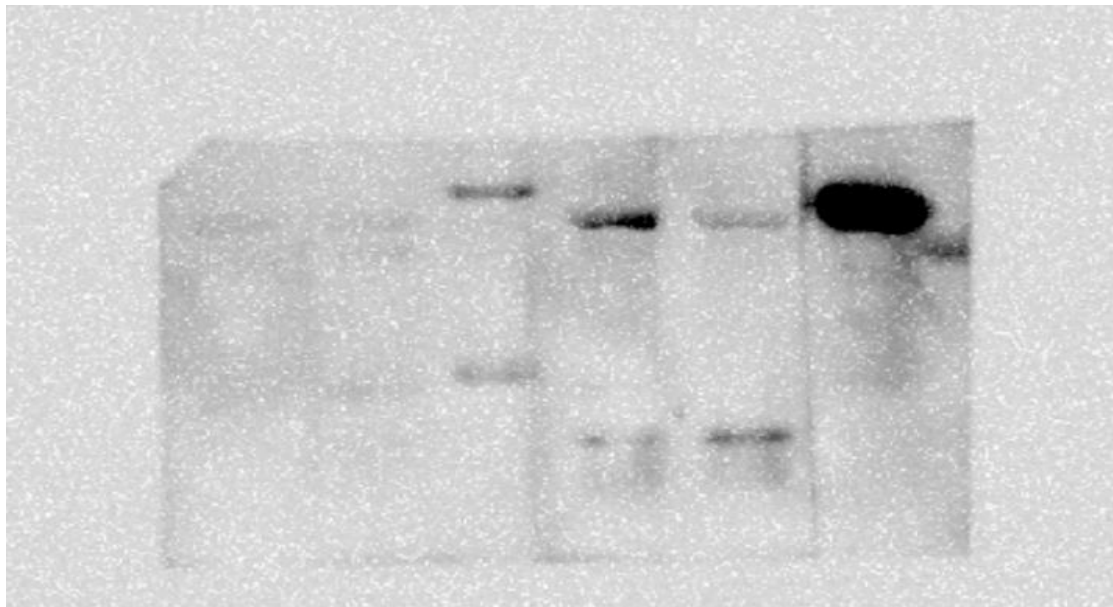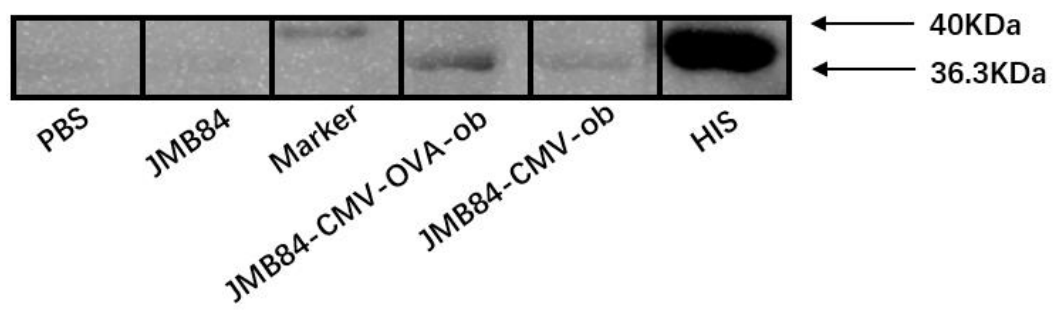

Supplement: Data_Sheet_1.PDF [file Data_Sheet_1.PDF]
